# Supplementary material for: Influence factors of CO adsorption on C2N-supported dual-atom catalysts unveiled by machine learning and twofold feature engineering
Source: Royal Society of Chemistry journal article supplement (doi:10.1039/d4cp00213j), 2024-01-01
Supplement: d4cp00213j1.pdf [file d4cp00213j1.pdf]

1        **Supporting Information**

2

3        **Influence Factors of CO Adsorption on C<sub>2</sub>N-Supported Dual-Atom Catalysts**

4                **Unveiled by Machine Learning and Twofold Feature Engineering**

5

6                Shikai Chang<sup>a</sup>, Hongshuai Wang<sup>a,b</sup>, Yujin Ji<sup>a\*</sup>, and Youyong Li<sup>a,c\*</sup>

7

8        a. Institute of Functional Nano & Soft Materials (FUNSOM), Jiangsu Key Laboratory for Carbon-  
9        Based Functional Materials & Devices, Soochow University, Suzhou, Jiangsu 215123, China.

10                                b. DP Technology, Beijing, 100080, China.

11        c. Macao Institute of Materials Science and Engineering, Macau University of Science and  
12                                Technology, Taipa, Macau SAR 999078, China.

13

14 **Note S1. The training process of the machine learning model**

15 The  $\Delta G_{\text{ads}}(\text{CO})$  calculated by DFT and the characteristics of two transition metal  
16 atoms form a dataset, which is divided into training and testing sets a ratio of 9:1.  
17 Tenfold cross-validation is employed to update the best hyperparameters via a grid  
18 search (**Table S5**). To compare the performances of different ML algorithms, we  
19 repeated the training 100 times and took the average of the results. When using  
20 LightGBM to train the model in **Figure S4**, as the number of iterations increases, the  
21 errors on the training and testing sets decrease and tend to stabilize. After about 20  
22 rounds, the error on the test set tends to stabilize, but the error on the training set is still  
23 decreasing. To prevent overfitting of the model, we stopped training where the test set  
24 error tends to stabilize.

25

26 **Note S2. The datasets selected for feature engineering**

27       When building two ML models using LightGBM, we did not separate the training  
28 set and the test set. Firstly, our dataset is relatively small, and after splitting out a portion  
29 of the test set, the model performs poorly. Secondly, this work focuses more on using  
30 machine learning methods and secondary feature engineering to screen atomic  
31 properties related to  $\Delta G_{\text{ads}}(\text{CO})$ . Therefore, training with all available data can yield  
32 better results.

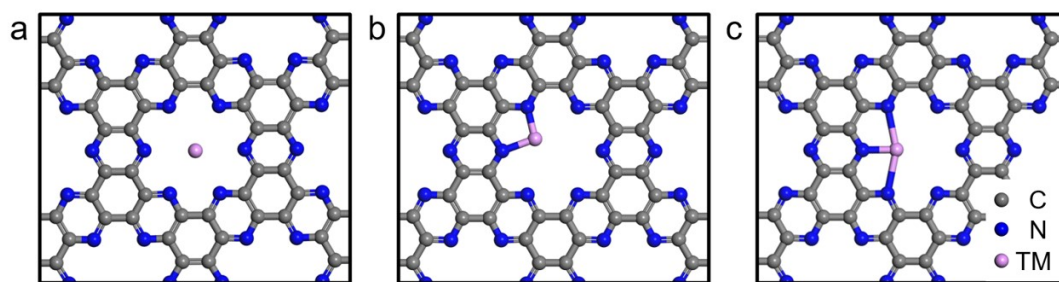

33

34 **Figure S1.** Three potential adsorption sites for single TM on  $C_2N$ , namely (a) site i: the

35 center of the hole, (b) site ii: the position bonded with two N atoms; (c) site iii: the

36 position bonded with three N atoms.

37

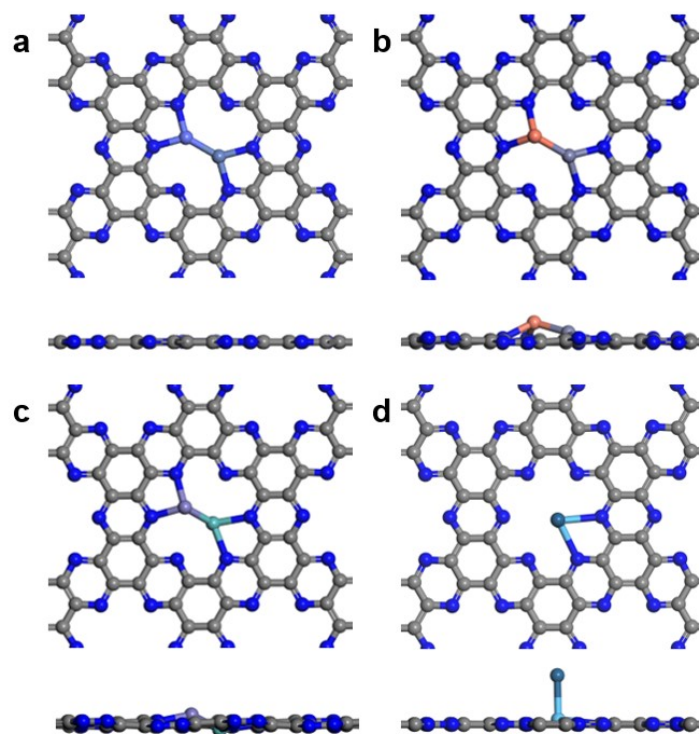

38

39 **Figure S2.** Optimized geometric configurations of  $\text{TM}_1\text{TM}_2@\text{C}_2\text{N}$  DACs: (a)

40  $\text{CoNi}@\text{C}_2\text{N}$ ; (b)  $\text{CuZn}@\text{C}_2\text{N}$ ; (c)  $\text{FeHf}@\text{C}_2\text{N}$ ; (d)  $\text{HfPt}@\text{C}_2\text{N}$ .

41

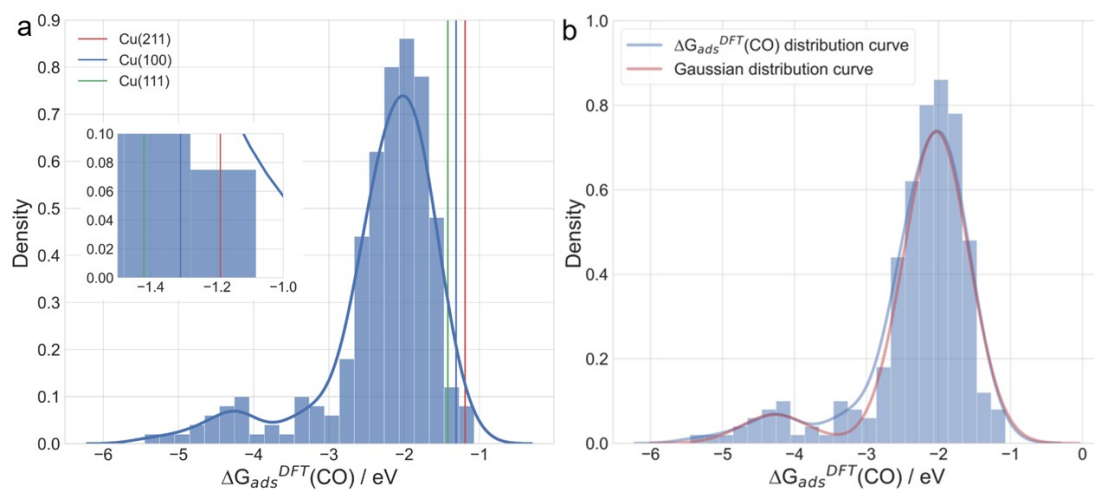

42

43 **Figure S3.** (a) The distribution of  $\Delta G_{\text{ads}}(\text{CO})$  on TM1TM2@C<sub>2</sub>N; (b) A Gaussian

44 distribution curve is used to fit the distribution curve of  $\Delta G_{\text{ads}}(\text{CO})$ .

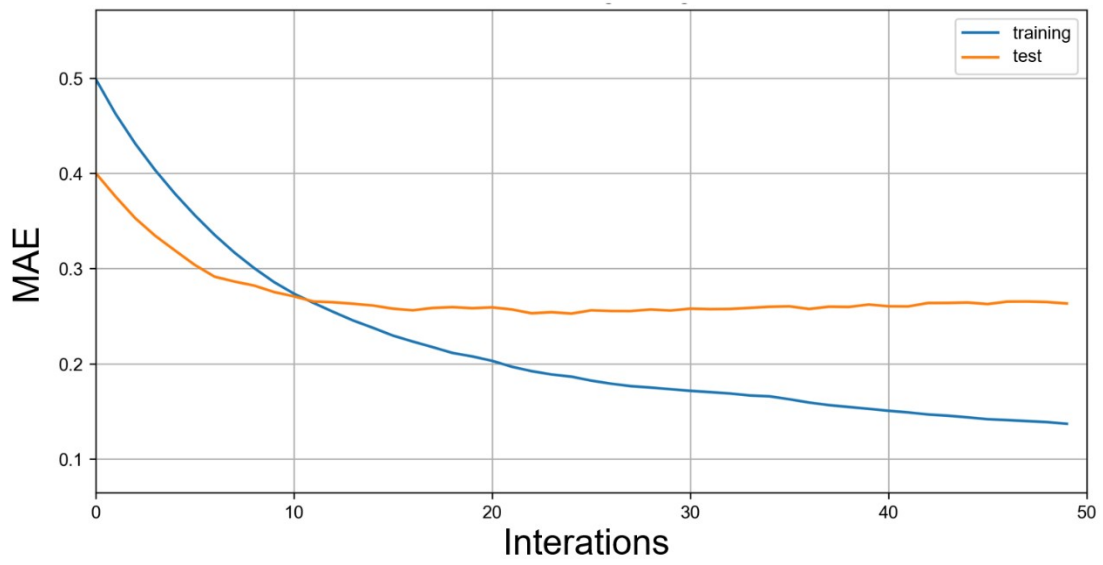

45

46 **Figure S4.** One of the 100 test results of the ML model built by LightGBM. The blue

47 line represents the training set data, and the yellow line represents the testing set data.

48

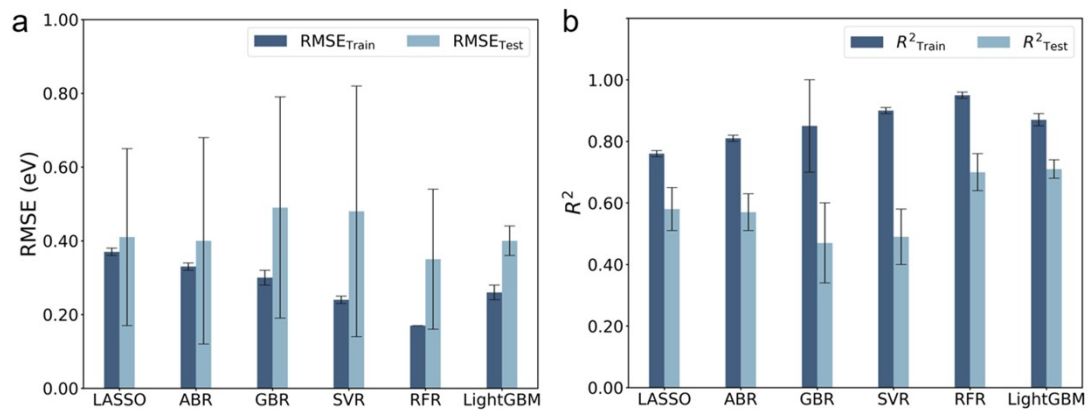

49

50 **Figure S5.** Performance of machine learning models using six algorithms on training

51 and test sets.

52



53 **Table S1.** The energies calculated of C<sub>2</sub>N anchoring TM atoms at three possible sites.

54 The most stable configurations are highlighted in red typeface. i, ii, iii represents that

55 after the structural optimization, the anchoring TM atoms move to another sites

|           | C <sub>2</sub> N@TM_i | C <sub>2</sub> N@TM_ii | C <sub>2</sub> N@TM_iii |           | C <sub>2</sub> N@TM_i | C <sub>2</sub> N@TM_ii | C <sub>2</sub> N@TM_iii |
|-----------|-----------------------|------------------------|-------------------------|-----------|-----------------------|------------------------|-------------------------|
| <b>Sc</b> | ii                    | -158.89                | <b>-158.90</b>          | <b>Tc</b> | ii                    | <b>-157.05</b>         | ii                      |
| <b>Ti</b> | ii                    | <b>-158.30</b>         | -158.27                 | <b>Ru</b> | ii                    | <b>-156.50</b>         | ii                      |
| <b>V</b>  | ii                    | <b>-157.41</b>         | ii                      | <b>Rh</b> | ii                    | <b>-155.40</b>         | ii                      |
| <b>Cr</b> | ii                    | <b>-156.79</b>         | ii                      | <b>Pd</b> | ii                    | <b>-153.46</b>         | -153.43                 |
| <b>Mn</b> | ii                    | <b>-156.37</b>         | ii                      | <b>Ag</b> | <b>-152.12</b>        | i                      | i                       |
| <b>Fe</b> | ii                    | <b>-155.90</b>         | ii                      | <b>Cd</b> | <b>-150.83</b>        | i                      | i                       |
| <b>Co</b> | ii                    | <b>-154.90</b>         | ii                      | <b>Hf</b> | iii                   | iii                    | <b>-160.55</b>          |
| <b>Ni</b> | ii                    | <b>-153.77</b>         | ii                      | <b>Ta</b> | ii                    | <b>-159.93</b>         | ii                      |
| <b>Cu</b> | ii                    | <b>-152.63</b>         | -152.58                 | <b>W</b>  | ii                    | <b>-158.82</b>         | -158.78                 |
| <b>Zn</b> | ii                    | <b>-150.61</b>         | ii                      | <b>Re</b> | ii                    | <b>-157.86</b>         | ii                      |
| <b>Y</b>  | <b>-160.32</b>        | i                      | i                       | <b>Os</b> | ii                    | <b>-157.24</b>         | ii                      |
| <b>Zr</b> | ii                    | <b>-159.80</b>         | -159.79                 | <b>Ir</b> | ii                    | <b>-155.87</b>         | ii                      |
| <b>Nb</b> | ii                    | <b>-158.93</b>         | -158.92                 | <b>Pt</b> | ii                    | <b>-153.54</b>         | -153.46                 |
| <b>Mo</b> | ii                    | <b>-157.75</b>         | -157.71                 | <b>Au</b> | <b>-151.27</b>        | i                      | i                       |

56

57

58 **Table S2.** The binding energy calculated of 248 TM1TM2@C<sub>2</sub>N DACs through the  
59 eq 1

| <b>TM1TM2</b> | <b><math>E_f</math>(eV)</b> | <b>TM1TM2</b> | <b><math>E_f</math>(eV)</b> | <b>TM1TM2</b> | <b><math>E_f</math>(eV)</b> |
|---------------|-----------------------------|---------------|-----------------------------|---------------|-----------------------------|
| <b>ScV</b>    | -8.35                       | <b>MnPd</b>   | -2.01                       | <b>ZrRu</b>   | -11.01                      |
| <b>ScCr</b>   | -6.43                       | <b>MnHf</b>   | -7.44                       | <b>ZrRh</b>   | -10.93                      |
| <b>ScMn</b>   | -6.48                       | <b>MnTa</b>   | -7.88                       | <b>ZrHf</b>   | -10.97                      |
| <b>ScFe</b>   | -7.71                       | <b>MnW</b>    | -6.52                       | <b>ZrTa</b>   | -11.35                      |
| <b>ScCo</b>   | -8.54                       | <b>MnRe</b>   | -5.62                       | <b>ZrW</b>    | -10.41                      |
| <b>ScNi</b>   | -8.18                       | <b>MnOs</b>   | -6.04                       | <b>ZrRe</b>   | -9.95                       |
| <b>ScRu</b>   | -9.90                       | <b>MnIr</b>   | -5.55                       | <b>ZrOs</b>   | -10.77                      |
| <b>ScRh</b>   | -9.61                       | <b>MnPt</b>   | -3.84                       | <b>ZrIr</b>   | -10.57                      |
| <b>ScHf</b>   | -10.02                      | <b>FeFe</b>   | -4.45                       | <b>NbNb</b>   | -8.93                       |
| <b>ScTa</b>   | -10.13                      | <b>FeCo</b>   | -5.04                       | <b>NbMo</b>   | -7.76                       |
| <b>ScRe</b>   | -8.58                       | <b>FeNi</b>   | -5.21                       | <b>NbRu</b>   | -10.34                      |
| <b>ScOs</b>   | -9.58                       | <b>FeCu</b>   | -3.85                       | <b>NbRh</b>   | -9.50                       |
| <b>ScIr</b>   | -9.59                       | <b>FeZn</b>   | -2.53                       | <b>NbPd</b>   | -7.18                       |
| <b>TiTi</b>   | -10.04                      | <b>FeZr</b>   | -8.89                       | <b>NbHf</b>   | -10.45                      |
| <b>TiV</b>    | -8.96                       | <b>FeNb</b>   | -8.34                       | <b>NbTa</b>   | -11.00                      |
| <b>TiCr</b>   | -7.10                       | <b>FeMo</b>   | -6.39                       | <b>NbW</b>    | -10.01                      |
| <b>TiMn</b>   | -6.55                       | <b>FeRu</b>   | -6.74                       | <b>NbRe</b>   | -9.53                       |
| <b>TiFe</b>   | -8.53                       | <b>FeRh</b>   | -5.43                       | <b>NbOs</b>   | -10.13                      |
| <b>TiCo</b>   | -9.17                       | <b>FePd</b>   | -3.38                       | <b>NbIr</b>   | -9.67                       |
| <b>TiNi</b>   | -8.48                       | <b>FeHf</b>   | -8.55                       | <b>NbPt</b>   | -7.88                       |
| <b>TiCu</b>   | -6.91                       | <b>FeTa</b>   | -8.91                       | <b>MoMo</b>   | -7.72                       |
| <b>TiZr</b>   | -10.7                       | <b>FeW</b>    | -7.48                       | <b>MoRu</b>   | -8.36                       |
| <b>TiNb</b>   | -10.21                      | <b>FeRe</b>   | -6.51                       | <b>MoRh</b>   | -7.23                       |
| <b>TiMo</b>   | -8.80                       | <b>FeOs</b>   | -6.84                       | <b>MoPd</b>   | -4.76                       |
| <b>TiRu</b>   | -10.45                      | <b>FeIr</b>   | -6.49                       | <b>MoTa</b>   | -9.72                       |

---

|             |        |             |       |             |        |
|-------------|--------|-------------|-------|-------------|--------|
| <b>TiRh</b> | -9.86  | <b>FePt</b> | -4.89 | <b>MoW</b>  | -8.59  |
| <b>TiPd</b> | -7.42  | <b>CoCo</b> | -5.89 | <b>MoRe</b> | -7.76  |
| <b>TiHf</b> | -10.57 | <b>CoNi</b> | -6.06 | <b>MoOs</b> | -8.17  |
| <b>TiTa</b> | -11.00 | <b>CoCu</b> | -4.54 | <b>MoIr</b> | -7.63  |
| <b>TiW</b>  | -9.64  | <b>CoZn</b> | -2.96 | <b>MoPt</b> | -5.75  |
| <b>TiRe</b> | -9.23  | <b>CoZr</b> | -9.51 | <b>RuRu</b> | -8.4   |
| <b>TiOs</b> | -10.10 | <b>CoNb</b> | -8.74 | <b>RuRh</b> | -7.74  |
| <b>TiIr</b> | -9.87  | <b>CoMo</b> | -6.65 | <b>RuPd</b> | -5.44  |
| <b>VV</b>   | -7.82  | <b>CoRu</b> | -7.19 | <b>RuHf</b> | -10.77 |
| <b>VCr</b>  | -6.15  | <b>CoRh</b> | -6.64 | <b>RuTa</b> | -11.01 |
| <b>VMn</b>  | -6.19  | <b>CoPd</b> | -4.35 | <b>RuW</b>  | -9.46  |
| <b>VFe</b>  | -7.18  | <b>CoHf</b> | -9.21 | <b>RuRe</b> | -8.29  |
| <b>VCo</b>  | -7.44  | <b>CoTa</b> | -9.51 | <b>RuOs</b> | -8.55  |
| <b>VNi</b>  | -6.78  | <b>CoW</b>  | -7.97 | <b>RuIr</b> | -8.2   |
| <b>VCu</b>  | -4.71  | <b>CoRe</b> | -6.71 | <b>RuPt</b> | -6.62  |
| <b>VZn</b>  | -3.74  | <b>CoOs</b> | -7.32 | <b>RhRh</b> | -7.16  |
| <b>VZr</b>  | -9.57  | <b>CoIr</b> | -7.05 | <b>RhPd</b> | -4.93  |
| <b>VNb</b>  | -9.25  | <b>CoPt</b> | -5.66 | <b>RhHf</b> | -10.36 |
| <b>VMo</b>  | -7.85  | <b>NiNi</b> | -6.08 | <b>RhTa</b> | -10.31 |
| <b>VRu</b>  | -9.15  | <b>NiCu</b> | -4.51 | <b>RhW</b>  | -8.61  |
| <b>VRh</b>  | -8.25  | <b>NiZn</b> | -3.00 | <b>RhRe</b> | -7.25  |
| <b>VPd</b>  | -5.41  | <b>NiZr</b> | -8.46 | <b>RhOs</b> | -7.76  |
| <b>VHf</b>  | -9.42  | <b>NiNb</b> | -8.35 | <b>RhIr</b> | -7.52  |
| <b>VTa</b>  | -9.89  | <b>NiMo</b> | -6.26 | <b>RhPt</b> | -5.91  |
| <b>VW</b>   | -8.69  | <b>NiRu</b> | -6.79 | <b>PdPd</b> | -2.55  |
| <b>VRe</b>  | -8.18  | <b>NiRh</b> | -6.56 | <b>PdTa</b> | -8.16  |
| <b>VOs</b>  | -8.82  | <b>NiPd</b> | -4.46 | <b>PdW</b>  | -6.27  |
| <b>VPt</b>  | -6.78  | <b>NiHf</b> | -8.22 | <b>PdRe</b> | -4.92  |

---

---

|             |       |             |        |             |        |
|-------------|-------|-------------|--------|-------------|--------|
| <b>CrCr</b> | -4.32 | <b>NiTa</b> | -9.34  | <b>PdOs</b> | -5.6   |
| <b>CrMn</b> | -3.98 | <b>NiW</b>  | -7.69  | <b>PdIr</b> | -5.39  |
| <b>CrFe</b> | -4.78 | <b>NiRe</b> | -6.44  | <b>HfHf</b> | -10.81 |
| <b>CrCo</b> | -4.67 | <b>NiOs</b> | -6.85  | <b>HfTa</b> | -11.22 |
| <b>CrNi</b> | -4.11 | <b>NiIr</b> | -6.89  | <b>HfW</b>  | -9.86  |
| <b>CrCu</b> | -2.72 | <b>NiPt</b> | -5.92  | <b>HfRe</b> | -9.74  |
| <b>CrZr</b> | -7.81 | <b>CuCu</b> | -3.38  | <b>HfOs</b> | -10.61 |
| <b>CrNb</b> | -7.49 | <b>CuZn</b> | -1.99  | <b>HfIr</b> | -10.38 |
| <b>CrMo</b> | -6.01 | <b>CuNb</b> | -6.88  | <b>TaTa</b> | -11.78 |
| <b>CrRu</b> | -6.7  | <b>CuMo</b> | -4.65  | <b>TaW</b>  | -10.48 |
| <b>CrRh</b> | -5.66 | <b>CuRu</b> | -5.97  | <b>TaRe</b> | -10.23 |
| <b>CrPd</b> | -2.8  | <b>CuRh</b> | -5.23  | <b>TaOs</b> | -10.96 |
| <b>CrHf</b> | -7.55 | <b>CuPd</b> | -3.12  | <b>TaIr</b> | -10.6  |
| <b>CrTa</b> | -7.95 | <b>CuTa</b> | -7.9   | <b>TaPt</b> | -8.98  |
| <b>CrW</b>  | -6.82 | <b>CuW</b>  | -5.96  | <b>WW</b>   | -9.54  |
| <b>CrRe</b> | -6.06 | <b>CuRe</b> | -4.68  | <b>WRe</b>  | -8.86  |
| <b>CrOs</b> | -6.58 | <b>CuOs</b> | -6.01  | <b>WOs</b>  | -9.43  |
| <b>CrIr</b> | -6.08 | <b>CuIr</b> | -5.96  | <b>WIr</b>  | -9.06  |
| <b>CrPt</b> | -4.27 | <b>CuPt</b> | -3.78  | <b>WPt</b>  | -7.66  |
| <b>MnMn</b> | -3.18 | <b>ZnRu</b> | -4.59  | <b>ReRe</b> | -8.07  |
| <b>MnFe</b> | -4.05 | <b>ZnRh</b> | -3.76  | <b>ReOs</b> | -8.4   |
| <b>MnCo</b> | -4.05 | <b>ZnPd</b> | -1.9   | <b>ReIr</b> | -7.69  |
| <b>MnNi</b> | -3.92 | <b>ZnW</b>  | -4.32  | <b>RePt</b> | -6.27  |
| <b>MnCu</b> | -2.81 | <b>ZnRe</b> | -3.65  | <b>OsOs</b> | -8.68  |
| <b>MnZn</b> | -1.42 | <b>ZnOs</b> | -4.52  | <b>OsIr</b> | -8.24  |
| <b>MnZr</b> | -7.8  | <b>ZnIr</b> | -4.2   | <b>OsPt</b> | -6.67  |
| <b>MnNb</b> | -7.42 | <b>ZnPt</b> | -2.95  | <b>IrIr</b> | -7.92  |
| <b>MnMo</b> | -5.65 | <b>ZrZr</b> | -10.96 | <b>IrPt</b> | -6.34  |

---

---

|             |       |             |        |             |       |
|-------------|-------|-------------|--------|-------------|-------|
| <b>MnRu</b> | -6.05 | <b>ZrNb</b> | -10.61 | <b>PtPt</b> | -4.42 |
| <b>MnRh</b> | -5.07 | <b>ZrMo</b> | -9.49  |             |       |

---

60

61

62 **Table S3.**  $\Delta G_{\text{ads}}(\text{CO})$  of 248 TM1TM2@C<sub>2</sub>N DACs calculated through the eq 2, eq 3,  
 63 eq 4, eq 5 and eq 6 .

| <b>TM1TM2</b> | <b><math>\Delta G_{\text{ads}}(\text{CO})/\text{eV}</math></b> | <b>TM1TM2</b> | <b><math>\Delta G_{\text{ads}}(\text{CO})/\text{eV}</math></b> | <b>TM1TM2</b> | <b><math>\Delta G_{\text{ads}}(\text{CO})/\text{eV}</math></b> |
|---------------|----------------------------------------------------------------|---------------|----------------------------------------------------------------|---------------|----------------------------------------------------------------|
| <b>ScV</b>    | -2.33                                                          | <b>MnPd</b>   | -2.26                                                          | <b>ZrRu</b>   | -2.24                                                          |
| <b>ScCr</b>   | -2.17                                                          | <b>MnHf</b>   | -2.25                                                          | <b>ZrRh</b>   | -3.21                                                          |
| <b>ScMn</b>   | -2.40                                                          | <b>MnTa</b>   | -2.02                                                          | <b>ZrHf</b>   | -2.63                                                          |
| <b>ScFe</b>   | -2.51                                                          | <b>MnW</b>    | -1.80                                                          | <b>ZrTa</b>   | -1.92                                                          |
| <b>ScCo</b>   | -2.70                                                          | <b>MnRe</b>   | -2.02                                                          | <b>ZrW</b>    | -2.02                                                          |
| <b>ScNi</b>   | -3.04                                                          | <b>MnOs</b>   | -2.01                                                          | <b>ZrRe</b>   | -1.96                                                          |
| <b>ScRu</b>   | -2.54                                                          | <b>MnIr</b>   | -1.58                                                          | <b>ZrOs</b>   | -1.36                                                          |
| <b>ScRh</b>   | -2.56                                                          | <b>MnPt</b>   | -2.23                                                          | <b>ZrIr</b>   | -3.10                                                          |
| <b>ScHf</b>   | -1.84                                                          | <b>FeFe</b>   | -2.24                                                          | <b>NbNb</b>   | -3.63                                                          |
| <b>ScTa</b>   | -2.44                                                          | <b>FeCo</b>   | -2.38                                                          | <b>NbMo</b>   | -2.84                                                          |
| <b>ScRe</b>   | -2.83                                                          | <b>FeNi</b>   | -2.31                                                          | <b>NbRu</b>   | -1.76                                                          |
| <b>ScOs</b>   | -3.09                                                          | <b>FeCu</b>   | -2.26                                                          | <b>NbRh</b>   | -2.09                                                          |
| <b>ScIr</b>   | -3.34                                                          | <b>FeZn</b>   | -1.96                                                          | <b>NbPd</b>   | -1.82                                                          |
| <b>TiTi</b>   | -2.41                                                          | <b>FeZr</b>   | -2.38                                                          | <b>NbHf</b>   | -1.94                                                          |
| <b>TiV</b>    | -2.18                                                          | <b>FeNb</b>   | -1.96                                                          | <b>NbTa</b>   | -2.53                                                          |
| <b>TiCr</b>   | -2.02                                                          | <b>FeMo</b>   | -1.83                                                          | <b>NbW</b>    | -2.24                                                          |
| <b>TiMn</b>   | -2.75                                                          | <b>FeRu</b>   | -1.92                                                          | <b>NbRe</b>   | -2.39                                                          |
| <b>TiFe</b>   | -1.94                                                          | <b>FeRh</b>   | -2.18                                                          | <b>NbOs</b>   | -2.45                                                          |
| <b>TiCo</b>   | -1.97                                                          | <b>FePd</b>   | -2.99                                                          | <b>NbIr</b>   | -2.63                                                          |
| <b>TiNi</b>   | -2.32                                                          | <b>FeHf</b>   | -2.40                                                          | <b>NbPt</b>   | -1.53                                                          |
| <b>TiCu</b>   | -1.92                                                          | <b>FeTa</b>   | -2.07                                                          | <b>MoMo</b>   | -1.58                                                          |
| <b>TiZr</b>   | -2.79                                                          | <b>FeW</b>    | -1.98                                                          | <b>MoRu</b>   | -1.55                                                          |
| <b>TiNb</b>   | -2.38                                                          | <b>FeRe</b>   | -2.07                                                          | <b>MoRh</b>   | -1.85                                                          |
| <b>TiMo</b>   | -1.91                                                          | <b>FeOs</b>   | -2.10                                                          | <b>MoPd</b>   | -1.91                                                          |
| <b>TiRu</b>   | -1.99                                                          | <b>FeIr</b>   | -1.78                                                          | <b>MoTa</b>   | -2.14                                                          |

---

|             |       |             |       |             |       |
|-------------|-------|-------------|-------|-------------|-------|
| <b>TiRh</b> | -1.99 | <b>FePt</b> | -2.39 | <b>MoW</b>  | -1.57 |
| <b>TiPd</b> | -1.93 | <b>CoCo</b> | -2.35 | <b>MoRe</b> | -1.47 |
| <b>TiHf</b> | -2.80 | <b>CoNi</b> | -2.20 | <b>MoOs</b> | -1.53 |
| <b>TiTa</b> | -2.46 | <b>CoCu</b> | -2.08 | <b>MoIr</b> | -1.68 |
| <b>TiW</b>  | -2.61 | <b>CoZn</b> | -2.32 | <b>MoPt</b> | -1.49 |
| <b>TiRe</b> | -2.14 | <b>CoZr</b> | -2.64 | <b>RuRu</b> | -1.54 |
| <b>TiOs</b> | -1.85 | <b>CoNb</b> | -2.22 | <b>RuRh</b> | -1.68 |
| <b>TiIr</b> | -2.65 | <b>CoMo</b> | -2.11 | <b>RuPd</b> | -1.89 |
| <b>VV</b>   | -1.43 | <b>CoRu</b> | -1.83 | <b>RuHf</b> | -2.43 |
| <b>VCr</b>  | -1.63 | <b>CoRh</b> | -1.46 | <b>RuTa</b> | -2.05 |
| <b>VMn</b>  | -1.54 | <b>CoPd</b> | -1.91 | <b>RuW</b>  | -1.82 |
| <b>VFe</b>  | -1.63 | <b>CoHf</b> | -2.65 | <b>RuRe</b> | -1.65 |
| <b>VCo</b>  | -1.91 | <b>CoTa</b> | -2.26 | <b>RuOs</b> | -1.69 |
| <b>VNi</b>  | -2.21 | <b>CoW</b>  | -2.10 | <b>RuIr</b> | -1.71 |
| <b>VCu</b>  | -2.71 | <b>CoRe</b> | -2.31 | <b>RuPt</b> | -2.08 |
| <b>VZn</b>  | -1.52 | <b>CoOs</b> | -1.89 | <b>RhRh</b> | -1.55 |
| <b>VZr</b>  | -1.95 | <b>CoIr</b> | -1.98 | <b>RhPd</b> | -1.85 |
| <b>VNb</b>  | -2.36 | <b>CoPt</b> | -2.26 | <b>RhHf</b> | -2.47 |
| <b>VMo</b>  | -1.76 | <b>NiNi</b> | -2.05 | <b>RhTa</b> | -2.07 |
| <b>VRu</b>  | -1.26 | <b>NiCu</b> | -2.21 | <b>RhW</b>  | -1.79 |
| <b>VRh</b>  | -1.19 | <b>NiZn</b> | -2.45 | <b>RhRe</b> | -1.72 |
| <b>VPd</b>  | -1.76 | <b>NiZr</b> | -3.35 | <b>RhOs</b> | -1.55 |
| <b>VHf</b>  | -1.91 | <b>NiNb</b> | -2.32 | <b>RhIr</b> | -1.61 |
| <b>VTa</b>  | -2.57 | <b>NiMo</b> | -2.26 | <b>RhPt</b> | -1.97 |
| <b>VW</b>   | -2.32 | <b>NiRu</b> | -2.30 | <b>PdPd</b> | -1.66 |
| <b>VRe</b>  | -1.89 | <b>NiRh</b> | -1.97 | <b>PdTa</b> | -1.72 |
| <b>VOs</b>  | -2.15 | <b>NiPd</b> | -1.71 | <b>PdW</b>  | -1.80 |
| <b>VPt</b>  | -2.22 | <b>NiHf</b> | -3.41 | <b>PdRe</b> | -1.83 |

---

---

|             |       |             |       |             |       |
|-------------|-------|-------------|-------|-------------|-------|
| <b>CrCr</b> | -1.34 | <b>NiTa</b> | -2.23 | <b>PdOs</b> | -1.82 |
| <b>CrMn</b> | -1.59 | <b>NiW</b>  | -2.29 | <b>PdIr</b> | -1.71 |
| <b>CrFe</b> | -1.74 | <b>NiRe</b> | -2.31 | <b>HfHf</b> | -1.39 |
| <b>CrCo</b> | -2.07 | <b>NiOs</b> | -2.46 | <b>HfTa</b> | -1.89 |
| <b>CrNi</b> | -2.63 | <b>NiIr</b> | -2.18 | <b>HfW</b>  | -2.58 |
| <b>CrCu</b> | -2.47 | <b>NiPt</b> | -1.86 | <b>HfRe</b> | -2.19 |
| <b>CrZr</b> | -2.33 | <b>CuCu</b> | -4.01 | <b>HfOs</b> | -2.91 |
| <b>CrNb</b> | -1.81 | <b>CuZn</b> | -3.36 | <b>HfIr</b> | -3.13 |
| <b>CrMo</b> | -1.47 | <b>CuNb</b> | -4.18 | <b>TaTa</b> | -2.63 |
| <b>CrRu</b> | -1.61 | <b>CuMo</b> | -4.61 | <b>TaW</b>  | -2.51 |
| <b>CrRh</b> | -1.67 | <b>CuRu</b> | -4.30 | <b>TaRe</b> | -2.48 |
| <b>CrPd</b> | -1.78 | <b>CuRh</b> | -4.07 | <b>TaOs</b> | -2.48 |
| <b>CrHf</b> | -2.45 | <b>CuPd</b> | -4.20 | <b>TaIr</b> | -2.57 |
| <b>CrTa</b> | -2.42 | <b>CuTa</b> | -4.06 | <b>TaPt</b> | -1.34 |
| <b>CrW</b>  | -1.88 | <b>CuW</b>  | -4.56 | <b>WW</b>   | -1.49 |
| <b>CrRe</b> | -1.82 | <b>CuRe</b> | -4.97 | <b>WRe</b>  | -2.20 |
| <b>CrOs</b> | -1.74 | <b>CuOs</b> | -4.34 | <b>WOs</b>  | -1.76 |
| <b>CrIr</b> | -1.71 | <b>CuIr</b> | -3.73 | <b>WIr</b>  | -2.17 |
| <b>CrPt</b> | -2.15 | <b>CuPt</b> | -5.45 | <b>WPt</b>  | -2.06 |
| <b>MnMn</b> | -2.03 | <b>ZnRu</b> | -3.69 | <b>ReRe</b> | -1.68 |
| <b>MnFe</b> | -1.96 | <b>ZnRh</b> | -3.34 | <b>ReOs</b> | -1.85 |
| <b>MnCo</b> | -2.33 | <b>ZnPd</b> | -4.32 | <b>ReIr</b> | -2.10 |
| <b>MnNi</b> | -2.49 | <b>ZnW</b>  | -4.19 | <b>RePt</b> | -2.00 |
| <b>MnCu</b> | -2.23 | <b>ZnRe</b> | -4.28 | <b>OsOs</b> | -1.99 |
| <b>MnZn</b> | -1.86 | <b>ZnOs</b> | -4.69 | <b>OsIr</b> | -1.80 |
| <b>MnZr</b> | -1.97 | <b>ZnIr</b> | -4.48 | <b>OsPt</b> | -2.37 |
| <b>MnNb</b> | -1.57 | <b>ZnPt</b> | -5.19 | <b>IrIr</b> | -2.02 |
| <b>MnMo</b> | -1.66 | <b>ZrZr</b> | -2.71 | <b>IrPt</b> | -2.62 |

---



---

|             |       |             |       |             |       |
|-------------|-------|-------------|-------|-------------|-------|
| <b>MnRu</b> | -1.80 | <b>ZrNb</b> | -1.95 | <b>PtPt</b> | -2.78 |
| <b>MnRh</b> | -1.22 | <b>ZrMo</b> | -2.06 |             |       |

---

64

65 The features used in this work are shown in Table S4. The last three features are  
 66 combined features formed by addition, subtraction, and multiplication to describe the  
 67 synergistic effect between two transition metal atoms.

68 Table S4. Complete feature space of individual and composite feature.

| Features                                 | Description                                              |
|------------------------------------------|----------------------------------------------------------|
| $Z$                                      | Atomic number                                            |
| $G$                                      | Group number                                             |
| $v$                                      | Valence                                                  |
| $P$                                      | Period number                                            |
| $\phi$                                   | Unfilled valence orbitals                                |
| $M$                                      | Atomic weight                                            |
| $\chi$                                   | Electronegativity                                        |
| $I_1$                                    | The first ionization energy                              |
| $I_2$                                    | The second ionization energy                             |
| $d_{\text{elec}}$                        | d electron number                                        |
| $EA$                                     | Electronic Affinity                                      |
| $\epsilon_{\text{HOMO}}$                 | Highest occupied molecular orbital Kohn-Sham eigenvalue  |
| $\epsilon_{\text{LUMO}}$                 | Lowest unoccupied molecular orbital Kohn-Sham eigenvalue |
| $r_{\text{M}}$                           | Metal atomic radius                                      |
| $r_{\text{cov}}$                         | Covalent radius                                          |
| $r_{\text{s}}$                           | s orbital radius                                         |
| $r_{\text{p}}$                           | p orbital radius                                         |
| $r_{\text{d}}$                           | d orbital radius                                         |
| $r_{\text{v}}$                           | The last one occupies orbital radius                     |
| $X_{\text{TM1}}+X_{\text{TM2}}, X^-$     | Addition between features                                |
| $ X_{\text{TM1}}-X_{\text{TM2}} ,  X^- $ | Absolute value of difference between features            |
| $X_{\text{TM1}}*X_{\text{TM2}}, X^*$     | Product between features                                 |

69

70 Table S5 List of hyperparameters search range with five ML algorithms using  
 71 GridSearchCV.

| <b>Algorithm</b> | <b>Hyperparameters search range</b>                                                                             |
|------------------|-----------------------------------------------------------------------------------------------------------------|
| <b>LASSO</b>     | alpha = [10 <sup>^</sup> (-6 ~ 6), step = 1]                                                                    |
| <b>ABR</b>       | learning_rate = [0.1~0.9, step = 0.1]<br>n_estimators = [50 ~ 200, step = 10]                                   |
| <b>GBR</b>       | max_depth = [5 ~ 15, step = 1]<br>learning_rate = [0.1~0.9, step = 0.1]<br>n_estimators = [50 ~ 200, step = 30] |
| <b>SVR</b>       | C = [10 <sup>^</sup> (-6 ~ 6), step = 1]<br>gamma = [10 <sup>^</sup> (-6 ~ 6), step = 1]                        |
| <b>RFR</b>       | n_estimators = [50~200, step = 10]<br>max_depth = [5 ~ 15, step = 1]                                            |

72

73 Table S6. List of hyperparameters of LightGBM.

| <b>Algorithm</b>  | <b>Hyperparameter</b> | <b>Value</b> |
|-------------------|-----------------------|--------------|
| <b>LightGBM</b>   | learning_rate         | 0.1          |
|                   | verbose               | -1           |
|                   | feature_pre_filter    | FALSE        |
|                   | lambda_1              | 0            |
|                   | lambda_12             | 0            |
|                   | num_leaves            | 1            |
|                   | feature_fraction      | 0.7          |
|                   | bagging_fraction      | 1            |
|                   | bagging_freq          | 1            |
| min_child_samples | 20                    |              |

74

75

76 Table S7. The MAE, RMSE,  $R^2$  and their standard deviations ( $\sigma$ ) of six machine  
 77 learning models tested in this work.

| <b>Algorithm</b> | <b>Set</b> | <b>MAE (eV)</b> | <b><math>\sigma</math></b> | <b>RMSE (eV)</b> | <b><math>\sigma</math></b> | <b><math>R^2</math></b> | <b><math>\sigma</math></b> |
|------------------|------------|-----------------|----------------------------|------------------|----------------------------|-------------------------|----------------------------|
| <b>LASSO</b>     | Training   | 0.27            | 0.01                       | 0.37             | 0.01                       | 0.76                    | 0.01                       |
|                  | Test       | 0.31            | 0.05                       | 0.41             | 0.07                       | 0.58                    | 0.24                       |
| <b>ABR</b>       | Training   | 0.27            | 0.01                       | 0.01             | 0.01                       | 0.81                    | 0.01                       |
|                  | Test       | 0.32            | 0.05                       | 0.40             | 0.06                       | 0.57                    | 0.28                       |
| <b>GBR</b>       | Training   | 0.21            | 0.01                       | 0.30             | 0.15                       | 0.85                    | 0.02                       |
|                  | Test       | 0.35            | 0.07                       | 0.49             | 0.13                       | 0.47                    | 0.30                       |
| <b>SVR</b>       | Training   | 0.16            | 0.01                       | 0.24             | 0.01                       | 0.90                    | 0.01                       |
|                  | Test       | 0.33            | 0.06                       | 0.48             | 0.09                       | 0.49                    | 0.34                       |
| <b>RFR</b>       | Training   | 0.13            | 0.00                       | 0.17             | 0.01                       | 0.95                    | 0.01                       |
|                  | Test       | 0.27            | 0.05                       | 0.35             | 0.06                       | 0.71                    | 0.19                       |
| <b>LightGBM</b>  | Training   | 0.19            | 0.01                       | 0.26             | 0.02                       | 0.87                    | 0.03                       |
|                  | Test       | 0.30            | 0.02                       | 0.40             | 0.03                       | 0.71                    | 0.04                       |

78

79 Table S8. The time spent by six machine learning models tested in this work under the  
 80 same computing resources.

| <b>Algorithm</b> | <b>Time (s)</b> |
|------------------|-----------------|
| <b>LASSO</b>     | 1.21            |
| <b>ABR</b>       | 5.48            |
| <b>GBR</b>       | 1.24            |
| <b>SVR</b>       | 4.99            |
| <b>RFR</b>       | 8.44            |
| <b>LightGBM</b>  | 1.30            |

81

82 Table S9. Two machine learning models based on LightGBM are used for feature  
 83 analysis, which used the same hyperparameters to compare the impact of single and  
 84 combined features on machine learning models and feature analysis.

|                        | <b>Hyperparameters</b>     |
|------------------------|----------------------------|
| <b>Training params</b> | learning_rate = 0.1        |
|                        | metric = ['l1']            |
|                        | verbose = -1               |
|                        | feature_pre_filter = False |
|                        | lambda_l1 = 0.0            |
|                        | lambda_l2 = 0.0            |
|                        | num_leaves = 31            |
|                        | feature_fraction = 0.86    |
|                        | bagging_fraction = 1.0     |
|                        | bagging_freq = 0           |
|                        | min_child_samples = 5      |

85
